# Supplementary material for: Induced and Evoked Brain Activation Related to the Processing of Onomatopoetic Verbs
Source: MDPI journal article supplement (doi:10.3390/brainsci12040481), 2022-04-06
Supplement: s1 [file s1]

Table S1: Word stimuli used in the experiment, sorted by group and with the related parameter values. Please note that not all onomatopoetic words in German are onomatopoetic when translated in English or in other languages.

| Onomatopoetic verbs   | Onomatopoeia | Familiarity | Loudness | Length | Frequency | Question | Answer | Non-onomatopoetic verbs | Onomatopoeia | Familiarity | Loudness | Length | Frequency | Question | Answer |
|-----------------------|--------------|-------------|----------|--------|-----------|----------|--------|-------------------------|--------------|-------------|----------|--------|-----------|----------|--------|
| ächzen (to groan)     | 2,9          | 3,4         | 2,4      | 6      | 16        | 1        | No     | ballern (to shoot)      | 2,2          | 3,6         | 3,7      | 7,0    | 16        | 2        | No     |
| donnern (to thunder)  | 2,8          | 3,9         | 3,8      | 7      | 15        | 2        | No     | beben (to quake)        | 2,1          | 3,7         | 3,2      | 5,0    | 16        | 1        | No     |
| gähnen (to yawn)      | 2,9          | 3,9         | 2,0      | 6      | 17        | 3        | No     | bersten (to break)      | 1,9          | 3,2         | 3,5      | 7,0    | 16        | 2        | No     |
| grölen (to bawl)      | 2,7          | 3,6         | 3,8      | 6      | 17        | 3        | No     | brodeln (to boil)       | 2,2          | 3,5         | 2,3      | 7,0    | 16        | 2        | No     |
| grummeln (to grumble) | 2,9          | 3,7         | 2,0      | 8      | 19        | 1        | No     | erörtern (to discuss)   | 1,3          | 3,7         | 1,9      | 8,0    | 13        | 2        | Yes    |
| gurgeln (to gargle)   | 2,9          | 3,7         | 2,4      | 7      | 18        | 1        | Yes    | filtern (to filter)     | 1,4          | 3,6         | 1,4      | 7,0    | 15        | 1        | Yes    |
| hauchen (to breathe)  | 2,9          | 3,6         | 1,1      | 7      | 17        | 1        | No     | fluchen (to curse)      | 2,2          | 3,8         | 3,0      | 7,0    | 15        | 2        | Yes    |
| hupen (to honk)       | 2,7          | 3,9         | 3,7      | 5      | 16        | 2        | No     | fräsen (to mil-cut)     | 1,8          | 3,3         | 3,6      | 6,0    | 17        | 3        | Yes    |
| kichern (to giggle)   | 2,6          | 3,8         | 2,2      | 7      | 16        | 1        | No     | jammern (to whine)      | 2,0          | 3,9         | 2,7      | 7,0    | 13        | 3        | No     |
| klappern (to rattle)  | 2,7          | 3,8         | 2,9      | 8      | 16        | 1        | No     | kehren (to sweep)       | 1,6          | 3,7         | 2,0      | 6,0    | 12        | 2        | No     |
| klatschen (to clap)   | 2,9          | 3,9         | 3,4      | 9      | 14        | 1        | No     | küssen (to kiss)        | 1,6          | 3,9         | 1,3      | 6,0    | 13        | 3        | No     |
| klirren (to clink)    | 3,1          | 3,7         | 2,7      | 7      | 17        | 2        | No     | labern (to talk)        | 1,9          | 3,8         | 2,5      | 6,0    | 17        | 1        | No     |

|                        |     |     |     |    |    |   |     |                         |     |     |     |     |    |   |     |
|------------------------|-----|-----|-----|----|----|---|-----|-------------------------|-----|-----|-----|-----|----|---|-----|
| knattern (to rattle)   | 2,7 | 3,6 | 3,1 | 8  | 17 | 2 | No  | mahnen (to remind)      | 1,8 | 3,6 | 2,8 | 6,0 | 14 | 3 | No  |
| knistern (to crackle)  | 2,5 | 3,8 | 2,0 | 8  | 17 | 1 | No  | nieseln (to drizzle)    | 2,0 | 3,8 | 1,3 | 7,0 | 19 | 1 | Yes |
| kreischen (to screech) | 2,7 | 3,7 | 3,9 | 9  | 16 | 1 | No  | plaudern (to chat)      | 1,8 | 3,8 | 2,4 | 8,0 | 13 | 2 | Yes |
| läuten (to ring)       | 2,5 | 3,7 | 3,3 | 6  | 14 | 1 | No  | plauschen (o chat)      | 1,6 | 2,9 | 2,2 | 9,0 | 18 | 2 | Yes |
| mampfen (to munch)     | 2,8 | 3,5 | 2,2 | 7  | 19 | 2 | Yes | raunen (to whisper)     | 2,2 | 3,4 | 2,1 | 6,0 | 18 | 3 | No  |
| murmeln (to mutter)    | 2,6 | 3,6 | 1,7 | 7  | 17 | 3 | No  | rieseln (to trickle     | 2,2 | 3,5 | 1,4 | 7,0 | 16 | 1 | Yes |
| peitschen (to whip)    | 2,6 | 3,7 | 3,4 | 9  | 16 | 2 | No  | rinnen (to stream)      | 1,5 | 2,6 | 1,6 | 6,0 | 17 | 1 | Yes |
| plätschern (to splash) | 2,6 | 3,8 | 1,9 | 10 | 17 | 1 | Yes | rotieren (to rotate)    | 1,6 | 3,6 | 2,2 | 8,0 | 15 | 2 | No  |
| prasseln (to patter)   | 2,8 | 3,6 | 2,9 | 8  | 17 | 2 | No  | schildern (to describe) | 1,5 | 3,7 | 2,1 | 9,0 | 13 | 2 | Yes |
| rappeln (to rattle)    | 2,7 | 3,4 | 2,7 | 7  | 18 | 2 | No  | schimpfen (to rant)     | 2,0 | 3,9 | 3,3 | 9,0 | 13 | 1 | No  |
| rascheln (to rustle)   | 2,5 | 3,8 | 1,8 | 8  | 17 | 2 | No  | schleifen (to grind)    | 2,2 | 3,7 | 2,9 | 9,0 | 14 | 2 | No  |
| rasseln (to clank)     | 2,8 | 3,6 | 2,6 | 7  | 17 | 2 | No  | schwatzen (to chatter)  | 1,9 | 3,7 | 2,5 | 9,0 | 17 | 2 | Yes |
| rauschen (to sough)    | 2,9 | 3,8 | 2,2 | 8  | 15 | 2 | No  | sickern (to seep)       | 1,6 | 3,2 | 1,4 | 7,0 | 17 | 3 | No  |
| röcheln (to wheeze)    | 2,6 | 3,6 | 2,3 | 7  | 19 | 3 | No  | sieden (to simmer)      | 1,5 | 3,3 | 1,9 | 6,0 | 18 | 1 | Yes |
| rülpsen (to burp)      | 2,7 | 3,7 | 2,9 | 7  | 18 | 3 | No  | spotten (to scoff)      | 2,2 | 3,5 | 2,8 | 7,0 | 16 | 3 | No  |

|                      |     |     |     |     |    |   |     |                       |     |     |     |     |    |   |     |
|----------------------|-----|-----|-----|-----|----|---|-----|-----------------------|-----|-----|-----|-----|----|---|-----|
| schluchzen (to sob)  | 2,6 | 3,8 | 2,4 | 10  | 18 | 3 | No  | sprudeln (to bubble)  | 2,0 | 3,8 | 2,2 | 8,0 | 14 | 1 | Yes |
| schlürfen (to slurp) | 2,9 | 3,6 | 2,3 | 9   | 15 | 1 | Yes | sprühen (to spray)    | 1,8 | 3,8 | 1,8 | 7,0 | 15 | 1 | Yes |
| schreien (to scream) | 2,5 | 3,9 | 3,9 | 8   | 12 | 2 | Yes | stammeln (to stammer) | 2,2 | 3,6 | 2,1 | 8,0 | 18 | 3 | No  |
| stöhnen (to moan)    | 2,8 | 3,8 | 2,7 | 7   | 15 | 1 | No  | tratschen (to gossip) | 1,8 | 3,6 | 2,6 | 9,0 | 17 | 2 | Yes |
| surren (to whirl)    | 2,9 | 3,2 | 1,9 | 6   | 17 | 1 | No  | tröpfeln (to drip)    | 2,2 | 3,7 | 1,6 | 8,0 | 18 | 1 | Yes |
| ticken(to tick)      | 3,1 | 3,8 | 2,0 | 6   | 14 | 1 | No  | walzen (to mill)      | 1,9 | 3,0 | 2,9 | 6,0 | 18 | 1 | No  |
| zischen (to hiss)    | 3,1 | 3,7 | 2,2 | 7,0 | 16 | 1 | Yes | zeteren (to nag)      | 2,2 | 2,9 | 3,2 | 6,0 | 18 | 2 | Yes |
| averages             | 2,8 | 3,7 | 2,6 | 7,4 | 16 |   |     |                       | 1,9 | 3,5 | 2,4 | 7,2 | 16 |   |     |

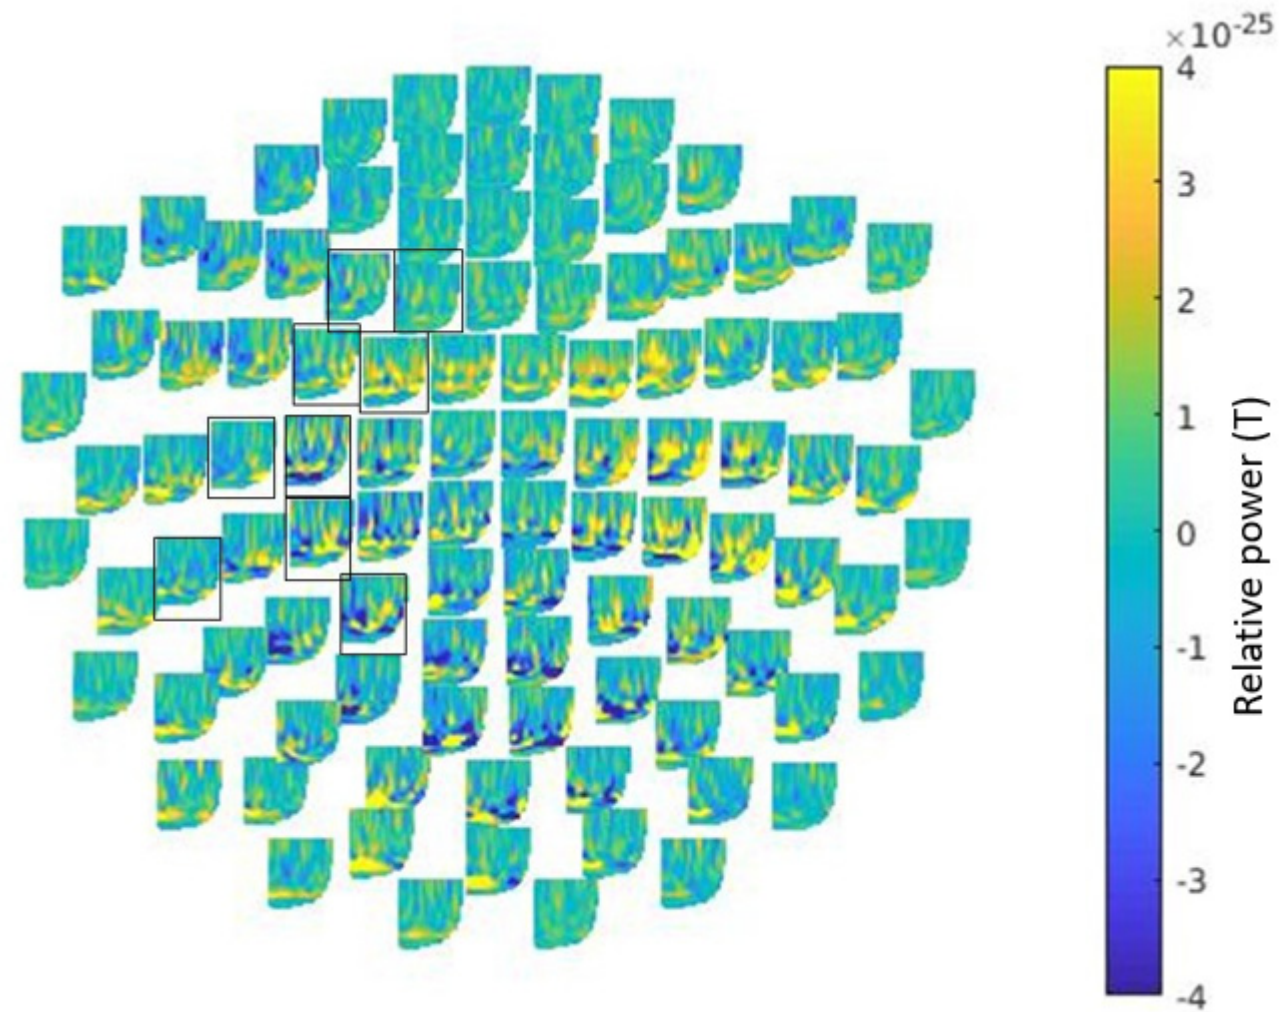

Figure S1: Grandaverage of power difference between onomatopoeic and non-onomatopoeic sound verbs across all channels. Each time-window starts 200 ms before word onset and ends 1000 ms after word onset. The frequency range is between 2 and 40 Hz. The black outline represents the channels selected for further analysis, taken from the localiser task in Nicolai et al. (2020).
